# Supplementary material for: Achieving sustained minimal disease activity with methotrexate in early interleukin 23-driven early psoriatic arthritis
Source: PubMed Central journal article supplement (PMC7425114; doi:10.1136/rmdopen-2020-001175), 2020-07-14
Supplement: rmdopen-2020-001175s001.pdf [file rmdopen-2020-001175s001.pdf]

**Supplementary Table 1** Sensitivity of cytokine measurements of bead-based immunoassay

| <b>Cytokine</b> | <b>Bead ID</b> | <b>MDC (pg/ml)</b> |
|-----------------|----------------|--------------------|
| IFN $\gamma$    | B2             | <4.28              |
| GM-CSF          | A6             | <1.89              |
| TNF $\alpha$    | A7             | <1.42              |
| IL-9            | A8             | <2.03              |
| IL-10           | B7             | <0.87              |
| IL-17A          | B4             | <1.65              |
| IL-17F          | B5             | <1.74              |
| CCL20           | A4             | <2.44              |
| IL-23           | A10            | <5.53              |
| IL-22           | B9             | <0.54              |
| IL-33           | B3             | <9.02              |
| VEGF            | B6             | <15.2              |

*Description of cytokines, bead identifiers (bead ID) and minimal detectable concentration (MDC) used in bead-based immunoassay (Legendplex)*
