# Supplementary material for: Achieving sustained minimal disease activity with methotrexate in early interleukin 23-driven early psoriatic arthritis
Source: PubMed Central journal article supplement (PMC7425114; doi:10.1136/rmdopen-2020-001175), 2020-07-14

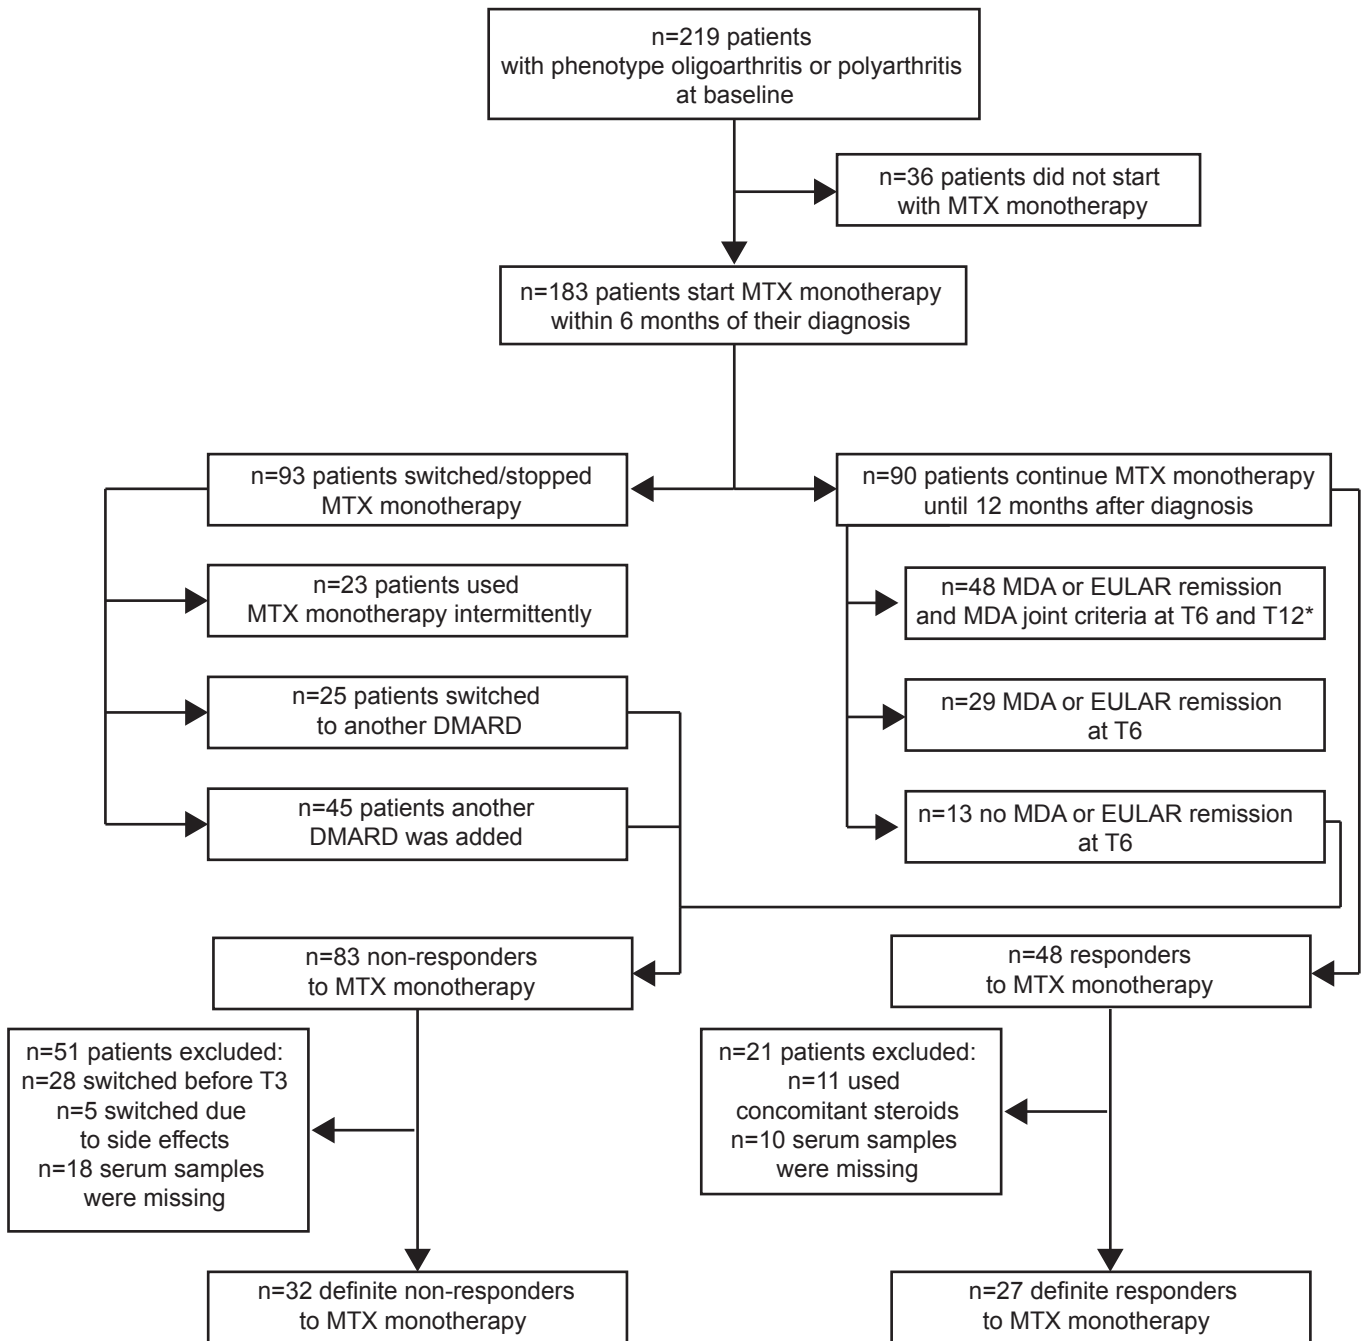

Supplement: rmdopen-2020-001175s002.pdf [file rmdopen-2020-001175s002.pdf]
